# Supplementary material for: Classification Algorithm for Person Identification and Gesture Recognition Based on Hand Gestures with Small Training Sets
Source: MDPI journal article supplement (doi:10.3390/s20247279), 2020-12-18
Supplement: s1 [file s1]

# Supplementary material for the paper Classification Algorithm for Person Identification and Gesture Recognition Based on Hand Gestures with Small Training Sets

(Dated: December 3rd, 2020)

Below there are pseudocodes of the algorithm proposed in the article.

**Require:** a survey  $\Theta_i = (x_i^v)_{v=1}^V, i \in \{1, 2, \dots, D\}$

```
1: for  $v = 1$  to  $2V$  do
2:   if  $v \leq V$  then
3:      $\Theta'(1, v) \leftarrow x_1^v$ 
4:   else
5:      $\Theta'(1, v) \leftarrow 0$ 
6:   end if
7: end for
8: for  $i \in \{2, 3, \dots, D\}$  do
9:   for  $v \in \{1, 2, \dots, 2V\}$  do
10:    if  $v \leq V$  then
11:       $\Theta'(i, v) \leftarrow x_i^v$ 
12:    else
13:       $\Theta'(i, v) \leftarrow x_i^v - x_{i-1}^v$ 
14:    end if
15:  end for
16: end for
17: return  $\Theta'$ 
```

**Algorithm 1:** Transformation, step 1 in training and prediction phases.

**Require:** symbol table  $\Pi''(i), i \in \{1, 2, \dots, D\}$

```
1: for  $l = 1$  to  $k_1$  do
2:    $B(l) \leftarrow 0$ 
3: end for
4: for  $i = 1$  to  $D$  do
5:    $B(\Pi''(i)) \leftarrow B(\Pi''(i)) + 1$ 
6: end for
7: return  $B$ 
```

**Algorithm 2:** Frequency table calculation, step 5 in training and step 3 in prediction.

**Require:** training data  $\Theta_{j,i} = (x_{j,i}^v)_{v=1}^V$ ,  $c_j$ ,  $j \in TR$ ,  $i \in \{1, 2, \dots, D\}$ ; clustering parameters  $k_1$ ,  $d_{clust}$ ;  $kNN$  parameters  $k_2$ ,  $d_{kNN}$

- 1: {Step 1.}
- 2: **for**  $j \in TR$  **do**
- 3:    $\Theta'(j, :, :) \leftarrow \text{TRANSFORM}(\Theta_{j,:})$
- 4: **end for**
- 5: {Step 2.}
- 6: **for**  $j \in TR$  **do**
- 7:   **for**  $i = 1$  **to**  $D$  **do**
- 8:     **for**  $v = 1$  **to**  $2V$  **do**
- 9:        $\Theta''(D(j-1) + i, v) \leftarrow \Theta'(j, i, v)$
- 10:     **end for**
- 11:   **end for**
- 12: **end for**
- 13: {Step 3.}
- 14:  $\Omega \leftarrow \text{K\_MEANS}(\Theta'', k_1, d_{clust})$
- 15: {Step 4.}
- 16: **for**  $j \in TR$  **do**
- 17:   **for**  $i = 1$  **to**  $D$  **do**
- 18:      $\Pi''(i, j) \leftarrow 1$
- 19:      $mindist \leftarrow d_{clust}(\Omega(1), \Theta'(j, i, :))$
- 20:     **for**  $c \in \{2, 3, \dots, k_1\}$  **do**
- 21:        $curdist \leftarrow d_{clust}(\Omega(c), \Theta'(j, i, :))$
- 22:       **if**  $curdist < mindist$  **then**
- 23:           $\Pi''(i, j) \leftarrow c$
- 24:           $mindist \leftarrow curdist$
- 25:       **end if**
- 26:     **end for**
- 27:   **end for**
- 28: **end for**
- 29: {Step 5.}
- 30: **for**  $j \in TR$  **do**
- 31:    $B(j, :) \leftarrow \text{FREQ\_TABLE}(\Pi''(:, j))$
- 32: **end for**
- 33: {Step 6.}
- 34: **for**  $l = 1$  **to**  $k_1$  **do**
- 35:   **for**  $c = 1$  **to**  $C$  **do**
- 36:      $\Gamma(c, l) \leftarrow 0$
- 37:      $N \leftarrow 0$
- 38:     **for**  $j \in TR$  **do**
- 39:       **if**  $c_j = c$  **then**
- 40:           $N \leftarrow N + 1$
- 41:           $\Gamma(c, l) \leftarrow \Gamma(c, l) + B(j, l)$
- 42:       **end if**
- 43:     **end for**
- 44:      $\Gamma(c, l) \leftarrow \Gamma(c, l) / N$
- 45:   **end for**
- 46: **end for**
- 47: { $kNN$  training with features  $\Theta'$ , classes  $\Omega$ ,  $k$  parameter equal to  $k_2$  and distance function  $d_{kNN}$ .}
- 48:  $\text{KNN\_MODEL} \leftarrow \text{KNN\_TRAINING}(\Theta', \Omega, k_2, d_{kNN})$
- 49: **return**  $\Gamma$ ,  $\text{KNN\_MODEL}$

**Algorithm 3:** Training algorithm.

**Require:** new survey  $\Theta_i = (x_i^v)_{v=1}^V$ ,  $i \in \{1, 2, \dots, D\}$ ; centroids  $\Gamma(c, l)$ ,  $c \in \{1, 2, \dots, C\}$ ,  $l \in \{1, 2, \dots, k_1\}$ ; clustering parameter  $k_1$ ;  $k$ NN model; distance function  $d_{VSM}$

- 1: {Step 1.}
- 2:  $\Theta' \leftarrow \text{TRANSFORM}(\Theta_i)$
- 3: {Step 2.}
- 4: **for**  $i = 1$  **to**  $D$  **do**
- 5:    $\Pi''_{new}(i) \leftarrow \text{KNN\_PREDICT}(\text{KNN\_MODEL}, \Theta'_i)$
- 6: **end for**
- 7: {Step 3.}
- 8:  $B_{new} \leftarrow \text{FREQ\_TABLE}(\Pi''_{new})$
- 9: {Step 4.}
- 10:  $c_{new} \leftarrow 1$
- 11:  $mindist \leftarrow d_{VSM}(\Gamma(1, :), B_{new})$
- 12: **for**  $c \in \{2, 3, \dots, C\}$  **do**
- 13:    $curdist \leftarrow d_{VSM}(\Gamma(c, :), B_{new})$
- 14:   **if**  $curdist < mindist$  **then**
- 15:      $c_{new} \leftarrow c$
- 16:      $mindist \leftarrow curdist$
- 17:   **end if**
- 18: **end for**
- 19: **return**  $c_{new}$

**Algorithm 4:** Prediction algorithm.
